# Supplementary material for: Engagement in Behavioral Parent Training: Review of the Literature and Implications for Practice
Source: Springer Nature journal article supplement (doi:10.1007/s10567-016-0205-2), 2016-06-16
Supplement: MOESM1 [file 10269252]

Studies Included in Analysis

Abrahamse, M. E., Junger, M., Chavannes, E. L., Coelman, F. J., Boer, F., & Lindauer, R. J. (2012). Parent-child interaction therapy for preschool children with disruptive behaviour problems in the Netherlands. *Child & Adolescent Psychiatry & Mental Health, 6*(1), 24-32. doi: doi:10.1186/1753-2000-6-24

Adesso, V. J., & Lipson, J. W. (1981). Group training of parents as therapists for their children. *Behavior Therapy*, *12*(5), 625-633. doi:10.1016/S0005-7894(81)80134-7

Aman, M. G., McDougle, C. J., Scahill, L., Handen, B., Arnold, L., Johnson, C., & ... Wagner, A. (2009). Medication and parent training in children with pervasive developmental disorders and serious behavior problems: Results from a randomized clinical trial. *Journal of The American Academy of Child & Adolescent Psychiatry*, *48*(12), 1143-1154. doi:10.1097/CHI.0b013e3181bfd669

Anastopoulos, A. D., Shelton, T. L., DuPaul, G. J., & Guevremont, D. C. (1993). Parent training for attention-deficit hyperactivity disorder: Its impact on parent functioning. *Journal of Abnormal Child Psychology*, *21*(5), 581-596. doi:10.1007/BF00916320

Anderson, L., Vostanis, P., & O'Reilly, M. (2005). Three‐year follow‐up of a family support service cohort of children with behavioural problems and their parents. *Child: Care, health &development, 31*(4), 469-477. doi:10.1111/j.1365-2214.2005.00527.x

Au, A., Lau, K. M., Wong, A. H. C., Lam, C., Leung, C., Lau, J., & Lee, Y. K. (2014). The Efficacy of a group Triple P (Positive Parenting Program) for Chinese parents with a child diagnosed with ADHD in Hong Kong: A pilot randomised controlled study. *Australian Psychologist, 49*(3), 151-162. doi:10.1111/ap.12053

Axberg, U., & Broberg, A. G. (2012). Evaluation of “The Incredible Years” in Sweden: The transferability of an American parent‐training program to Sweden. *Scandinavian Journal of Psychology, 53*(3), 224-232. doi:10.1111/j.1467-9450.2012.00955.x

Axberg, U., Hansson, K., & Broberg, A. G. (2007). Evaluation of the Incredible Years Series-An open study of its effects when first introduced in Sweden. *Nordic Journal of Psychiatry, 61*(2), 143-151. doi:10.1080/08039480701226120

Axelrad, M. E., Garland, B. H., & Love, K. (2009). Brief behavioral intervention for young children with disruptive behaviors. *Journal of Clinical Psychology in Medical Settings*, *16*(3), 263-269. doi:10.1007/s10880-009-9166-7

Axelrad, M. E., Butler, A. M., Dempsey, J., & Chapman, S. G. (2013). Treatment effectiveness of a brief behavioral intervention for preschool disruptive behavior. *Journal of Clinical Psychology in Medical Settings, 20*(3), 323-332. doi:10.1007/s10880-013-9359-y

Azevedo, A. F., Seabra-Santos, M. J., Gaspar, M. F., & Homem, T. C. (2013). The Incredible Years basic parent training for Portuguese preschoolers with AD/HD behaviors: Does it make a difference? *Child & Youth Care Forum, 42*(5), 403-424. doi:10.1007/s10566-013-9207-0

Babinski, D. E., Waxmonsky, J. G., & Pelham Jr, W. E. (2014). Treating parents with attention-deficit/hyperactivity disorder: The effects of behavioral parent training and acute stimulant medication treatment on parent–child interactions. *Journal of Abnormal Child Psychology, 42*(7), 1129-1140. doi:10.1007/s10802-014-9864-y

Bagner, D. M., & Eyberg, S. M. (2007). Parent-child interaction therapy for disruptive behavior in children with mental retardation: A randomized controlled trial. *Journal of Clinical Child & Adolescent Psychology*, *36*(3), 418-429. doi:10.1080/15374410701448448.

Bagner, D. M., & Eyberg, S. M. (2003). Father Involvement in Parent Training: When Does It Matter? *Journal of Clinical Child & Adolescent Psychology*, *32*(4), 599-605. doi:10.1207/S15374424JCCP3204_13

Bagner, D. M., Sheinkopf, S. J., Vohr, B. R., & Lester, B. M. (2010). Parenting intervention for externalizing behavior problems in children born premature: An initial examination. *Journal of Developmental & Behavioral Pediatrics*, *31*(3), 209-216. doi:10.1097/DBP.0b013e3181d5a294

Barkley, R. A., Shelton, T. L., Crosswait, C., Moorehouse, M., Fletcher, K., Barrett, S., & ... Metevia, L. (2000). Multimethod psychoeducational intervention for preschool children with disruptive behavior: Two-year post-treatment follow-up. *Journal of Abnormal Child Psychology, 28*(3), 253-266. doi:10.1023/A:1005144304071

Basu, S., & Deb, A. (1996). Parent training in children with attention deficit hyperactivity disorder: an integrated approach for greater effectiveness. *Indian Journal of Clinical Psychology, 23*, 184-191.

Behan, J., Fitzpatrick, C., Sharry, J., Carr, A., & Waldron, B. (2001). Evaluation of the parenting plus programme. *The Irish Journal of Psychology, 22*(3-4), 238-256.

Berge, J. M., Law, D. D., Johnson, J., & Wells, M. G. (2010). Effectiveness of a psychoeducational parenting group on child, parent, and family behavior: A pilot study in a family practice clinic with an underserved population. *Families, Systems, & Health, 28*(3), 224. doi:10.1037/a0020907

Berkovits, M. D., O'Brien, K. A., Carter, C. G., & Eyberg, S. M. (2010). Early identification and intervention for behavior problems in primary care: A comparison of two abbreviated versions of parent-child interaction therapy. *Behavior Therapy, 41*(3), 375-387. doi:10.1016/j.beth.2009.11.002

Bernal, M. E., Klinnert, M. D., & Schultz, L. A. (1980). Outcome evaluation of behavioral parent training and client-centered parent counseling for children with conduct problems. *Journal of Applied Behavior Analysis*, *13*(4), 677-691. doi:10.1901/jaba.1980.13-677

Bierman, K. L., Coie, J., Dodge, K., Greenberg, M., Lochman, J., McMohan, R., & Pinderhughes, E. (2013). School outcomes of aggressive‐disruptive children: Prediction from kindergarten risk factors and impact of the Fast Track prevention program. *Aggressive Behavior, 39*(2), 114-130. doi:10.1002/ab.21467

Bjørknes, R., & Manger, T. (2013). Can parent training alter parent practice and reduce conduct problems in ethnic minority children? A randomized controlled trial. *Prevention Science, 14*(1), 52-63. doi:10.1007/s11121-012-0299-9

Bor, W., Sanders, M. R., & Markie-Dadds, C. (2002). The effects of the Triple P-positive Parenting Program on preschool children with co-occurring disruptive behavior and attentional/hyperactive difficulties. *Journal of Abnormal Child Psychology*, *30*(6), 571-587. doi:10.1023/A:1020807613155

Bradley, S. J., Jadaa, D. A., Brody, J., Landy, S., Tallett, S. E., Watson, W., ... & Stephens, D. (2003). Brief psychoeducational parenting program: An evaluation and 1-year follow-up. *Journal of the American Academy of Child & Adolescent Psychiatry, 42*(10), 1171-1178. doi:10.1097/00004583-200310000-00007

Braet, C., Meerschaert, T., Merlevede, E., Bosmans, G., Van Leeuwen, K., & De Mey, W. (2009). Prevention of antisocial behaviour: Evaluation of an early intervention programme. *European Journal of Developmental Psychology, 6*(2), 223-240. doi:10.1080/17405620601033194

Budd, K. S., Hella, B., Bae, H., Meyerson, D. A., & Watkin, S. C. (2011). Delivering parent-child interaction therapy in an urban community clinic. *Cognitive & Behavioral Practice, 18*(4), 502-514. doi:10.1016/j.cbpra.2010.12.002

Bushman, B. B., & Peacock, G. (2010). Does teaching problem-solving skills matter? An evaluation of problem-solving skills training for the treatment of social and behavioral problems in children. *Child & Family Behavior Therapy*, *32*(2), 103-124. doi:10.1080/07317101003776449

Canu, W. H., & Bearman, S. K. (2011). Community-clinic-based parent intervention addressing noncompliance in children with Attention-Deficit/Hyperactivity Disorder. *Cognitive & Behavioral Practice, 18*(4), 491-501. doi:10.1016/j.cbpra.2010.07.005

Cefai, J., Smith, D., & Pushak, R. E. (2010). Parenting wisely: Parent training via CD-ROM with an Australian sample. *Child & Family Behavior Therapy, 32*(1), 17-33. doi:10.1080/07317100903539709

Chacko, A., Wymbs, B. T., Wymbs, F. A., Pelham, W. E., Swanger-Gagne, M. S., Girio, E., & ... O’Connor, B. (2009). Enhancing traditional behavioral parent training for single mothers of children with ADHD. *Journal of Clinical Child and Adolescent Psychology*, *38*(2), 206-218. doi:10.1080/15374410802698388

Chacko, A., Wymbs, B., Flammer-Rivera, L., Pelham, W., Walker, K., Arnold, F., et al. (2008). A pilot study of the feasibility and efficacy of the Strategies to Enhance Positive Parenting (STEPP) program for single mothers of children with ADHD. *Journal of Attention Disorders, 12(3),* 270-280. doi:10.1177/1087054707306119

Chamberlain, P., Price, J., Reid, J., & Landsverk, J. (2008). Cascading implementation of a foster and kinship parent intervention. *Child Welfare: Journal Of Policy, Practice, & Program*, *87*(5), 27-48.

Christensen, A., Johnson, S. M., Phillips, S., & Glasgow, R. E. (1980). Cost effectiveness in behavioral family therapy. *Behavior Therapy*, *11*(2), 208-226. doi:10.1016/S0005-7894(80)80021-9

Chronis-Tuscano, A., Clarke, T. L., O’Brien, K. A., Raggi, V. L., Diaz, Y., Mintz, A. D., ... & Lewinsohn, P. (2013). Development and preliminary evaluation of an integrated treatment targeting parenting and depressive symptoms in mothers of children with attention-deficit/hyperactivity disorder. *Journal of Consulting &Clinical Psychology, 81*(5), 918-925. doi:10.1037/a0032112

Chronis-Tuscano, A., Lewis-Morrarty, E., Woods, K. E., O’Brien, K. A., Mazursky-Horowitz, H., & Thomas, S. R. (2014). Parent–child interaction therapy with emotion coaching for preschoolers with Attention-Deficit/Hyperactivity Disorder. *Cognitive & Behavioral Practice.* doi:10.1016/j.cbpra.2014.11.001

Chronis-Tuscano, A., O’Brien, K. A., Johnston, C., Jones, H. A., Clarke, T. L., Raggi, V. L., ... & Seymour, K. E. (2011). The relation between maternal ADHD symptoms & improvement in child behavior following brief behavioral parent training is mediated by change in negative parenting. *Journal of Abnormal Child Psychology, 39*(7), 1047-1057.

Conduct Problems Prevention Research Group. (2011). The effects of the Fast Track preventive intervention on the development of conduct disorder across childhood. *Child Development, 82*(1), 331-345. doi: 10.1111/j.1467-8624.2010.01558.x

Connell, S., Sanders, M. R., & Markie-Dadds, C. (1997). Self-directed behavioral family intervention for parents of oppositional children in rural and remote areas. *Behavior Modification, 21*(4), 379-408. doi:10.1177/01454455970214001

Connolly, L., Sharry, J., & Fitzpatrick, C. (2001). Evaluation of a group treatment programme for parents of children with behavioural disorders. *Child & Adolescent Mental Health*, *6*(4), 159-165. doi:10.1111/1475-3588.00340

Corkum, P. V., McKinnon, M., & Mullane, J. C. (2005). The effect of involving classroom teachers in a parent training program for families of children with ADHD. *Child & Family Behavior Therapy*, *27*(4), 29-49. doi:10.1300/J019v27n04_02

Corkum, P., Rimer, P., & Schachar, R. (1999). Parental knowledge of attention-deficit hyperactivity disorder and opinions of treatment options: Impact on enrollment and adherence to a 12-month treatment trial. *Canadian Journal of Psychiatry, 44*(10), 1043-1048. doi: 3106376841999-15894-009

Costin, J., & Chambers, S. M. (2007). Parent management training as a treatment for children with Oppositional Defiant Disorder referred to a mental health clinic. *Clinical Child Psychology & Psychiatry*, *12*(4), 511-524. doi:10.1177/1359104507080979

Coughlin, M., Sharry, J., Fitzpatrick, C., Guerin, S., & Drumm, M. (2009). A controlled clinical evaluation of the parents plus children’s programme: A video-based programme for parents of children aged 6 to 11 with behavioural and developmental problems. *Clinical Child Psychology & Psychiatry*, *14*(4), 541-558. doi:10.1177/1359104509339081

Cunningham, C. E., Bremner, R., & Boyle, M. (1995). Large group community-based parenting programs for families of preschoolers at risk for disruptive behaviour disorders: Utilization, cost effectiveness, and outcome. *Child Psychology & Psychiatry & Allied Disciplines*, *36*(7), 1141-1159. doi:10.1111/j.1469-7610.1995.tb01362.x

Curtis, D. F., Chapman, S., Dempsey, J., & Mire, S. (2013). Classroom changes in ADHD symptoms following clinic-based behavior therapy. *Journal of Clinical Psychology in Medical Settings, 20*(1), 114-122. doi:10.1007/s10880-012-9307-2

Dadds, M. R., & McHugh, T. A. (1992). Social support and treatment outcome in behavioral family therapy for child conduct problems. *Journal of Consulting & Clinical Psychology*, *60*(2), 252-259. doi:10.1037/0022-006X.60.2.252

DeGarmo, D. S., & Forgatch, M. S. (2007). Efficacy of parent training for stepfathers: From playful spectator and polite stranger to effective stepfathering. *Parenting: Science & Practice*, *7*(4), 331-355. doi:10.1080/15295190701665631

DeGarmo, D. S., Patterson, G. R., & Forgatch, M. S. (2004). How do outcomes in a specified parent training intervention maintain or wane over time? *Prevention Science*, *5*(2), 73-89. doi:10.1023/B:PREV.0000023078.30191.e0

Dishion, T. J., Brennan, L. M., Shaw, D. S., McEachern, A. D., Wilson, M. N., & Jo, B. (2014). Prevention of problem behavior through annual family check-ups in early childhood: intervention effects from home to early elementary school. *Journal of Abnormal Child Psychology, 42*(3), 343-354. doi:10.1007/s10802-013-9768-2

Dittman, C. K., Farruggia, S. P., Palmer, M. L., Sanders, M. R., & Keown, L. J. (2014). Predicting success in an online parenting intervention: The role of child, parent, and family factors. *Journal of Family Psychology, 28*(2), 236. doi:10.1037/a0035991

Drugli, M., Larsson, B., & Clifford, G. (2007). Changes in social competence in young children treated because of conduct problems as viewed by multiple informants. *European Child & Adolescent Psychiatry*, *16*(6), 370-378. doi:10.1007/s00787-007-0609-0

Dubey, D. R., O'Leary, S. G., & Kaufman, K. F. (1983). Training parents of hyperactive children in child management: A comparative outcome study. *Journal of Abnormal Child Psychology*, *11*(2), 229-246. doi:10.1007/BF00912088

Dumas, J. E. (1984). Interactional correlates of treatment outcome in behavioral parent training. *Journal of Consulting & Clinical Psychology*, *52*(6), 946-954. doi:10.1037/0022-006X.52.6.946

Dumas, J. E., & Albin, J. B. (1986). Parent training outcome: Does active parental involvement matter? *Behaviour Research & Therapy*, *24*(2), 227-230. doi:10.1016/0005-7967(86)90097-5

DuPaul, G. J., Kern, L., Volpe, R., Caskie, G. I., Sokol, N., Arbolino, L., ... & Pipan, M. (2013). Comparison of parent education and functional assessment-based intervention across 24 months for young children with attention deficit hyperactivity disorder. *School Psychology Review, 42*(1), 56-75.

Eames, C. C., Daley, D. D., Hutchings, J. J., Whitaker, C. J., Jones, K. K., Hughes, J. C., & Bywater, T. T. (2009). Treatment fidelity as a predictor of behaviour change in parents attending group-based parent training. *Child: Care, Health & Development*, *35*(5), 603-612. doi:10.1111/j.1365-2214.2009.00975.x

Eisenstadt, T. H., Eyberg, S., McNeil, C. B., Newcomb, K., & Funderburk, B. (1993). Parent-child interaction therapy with behavior problem children: Relative effectiveness of two stages and overall treatment outcome. *Journal of Clinical Child Psychology*, *22*(1), 42-51. doi:10.1207/s15374424jccp2201_4

Ercan, E. S., Ardic, U. A., Kutlu, A., & Durak, S. (2012). No beneficial effects of adding parent training to methylphenidate treatment for ADHD+ ODD/CD children: a 1-year prospective follow-up study. *Journal of Attention Disorders*, *18*(2), 145-157, 1087054711432884.

Ercan, E. S., Kose, S., Kutlu, A., Akyol, O., Durak, S., & Aydin, C. (2012). Treatment duration is associated with functioning and prognosis in children with attention deficit hyperactivity disorder. *Bulletin of Clinical Psychopharmacology, 22*(2), 148-160. doi: 10.5455/bcp.20120412021635

Ercan, E., Varan, A., & Deniz, Ü. (2005). Effects of combined treatment on Turkish children diagnosed with Attention-Deficit/Hyperactivity Disorder: A preliminary report. *Journal of Child and Adolescent Psychopharmacology*, *15*(2), 203-219. doi:10.1089/cap.2005.15.203

Eyberg, S. M., & Johnson, S. M. (1974). Multiple assessment of behavior modification with families: Effects of contingency contracting and order of treated problems. *Journal of Consulting & Clinical Psychology, 42*(4), 594-606. doi:10.1037/h0036723

Eyberg, S. M., & Matarazzo, R. G. (1980). Training parents as therapists: A comparison between individual parent–child interaction training and parent group didactic training. *Journal of Clinical Psychology*, *36*(2), 492-499. doi:10.1002/jclp.6120360218

Eyberg, S. M., & Robinson, E. A. (1982). Parent–child interaction training: Effects on family functioning. *Journal of Clinical Child Psychology*, *11*(2), 130-137. doi:10.1080/15374418209533076

Fabiano, G. A., Chacko, A., Pelham, W. r., Robb, J., Walker, K. S., Wymbs, F., & ... Pirvics, L. (2009). A comparison of behavioral parent training programs for fathers of children with attention-deficit/hyperactivity disorder. *Behavior Therapy*, *40*(2), 190-204. doi:10.1016/j.beth.2008.05.002

Fabiano, G. A., Pelham, W. E., Cunningham, C. E., Yu, J., Gangloff, B., Buck, M., ... & Gera, S. (2012). A waitlist-controlled trial of behavioral parent training for fathers of children with ADHD. *Journal of Clinical Child & Adolescent Psychology, 41*(3), 337-345. doi:10.1080/15374416.2012.654464

Farris, J. R., Bert, S. S. C., Nicholson, J. S., Glass, K., & Borkowski, J. G. (2013). Effective intervention programming: Improving maternal adjustment through parent education. *Administration & Policy in Mental Health & Mental Health Services Research, 40*(3), 211-223. doi:10.1007/s10488-011-0397-1

Fayyad, J. A., Farah, L., Cassir, Y., Salamoun, M. M., & Karam, E. G. (2010). Dissemination of an evidence-based intervention to parents of children with behavioral problems in a developing country. *European Child & Adolescent Psychiatry, 19*(8), 629-636. doi:10.1007/s00787-010-0099-3

Feinfield, K., & Baker, B. L. (2004). Empirical support for a treatment program for families of young children with externalizing problems. *Journal of Clinical Child & Adolescent Psychology*, *33*(1), 182-195. doi:10.1207/S15374424JCCP3301_17

Ferber, H., Keeley, S. M., & Shemberg, K. M. (1974). Training parents in behavior modification: Outcome of and problems encountered in a program after Patterson's work. *Behavior Therapy*, *5*(3), 415-419. doi:10.1016/S0005-7894(74)80010-9

Fernandez, M. A., & Eyberg, S. M. (2009). Predicting treatment and follow-up attrition in parent–child interaction therapy. *Journal of Abnormal Child Psychology*, *37*(3), 431-441. doi:10.1007/s10802-008-9281-1

Ferrin, M., Moreno-Granados, J. M., Salcedo-Marin, M. D., Ruiz-Veguilla, M., Perez-Ayala, V., & Taylor, E. (2014). Evaluation of a psychoeducation programme for parents of children and adolescents with ADHD: immediate and long-term effects using a blind randomized controlled trial. *European Child & Adolescent Psychiatry, 23*(8), 637-647. doi:10.1007/s00787-013-0494-7

Firestone, P., Kelly, M. J., & Fike, S. (1980). Are fathers necessary in parent training groups? *Journal of Clinical Child Psychology, 9*(1), 44-47. doi:10.1080/15374418009532943

Firestone, P., & Witt, J. E. (1982). Characteristics of families completing and prematurely discontinuing a behavioral parent-training program. *Journal of Pediatric Psychology*, *7*(2), 209-222. doi:10.1093/jpepsy/7.2.209

Fleischman, M. J. (1981). A replication of Patterson's 'Intervention for boys with conduct problems.'. *Journal of Consulting & Clinical Psychology, 49*(3), 342-351. doi:10.1037/0022-006X.49.3.342

Fleischman, M. J. (1979). Using parenting salaries to control attrition and cooperation in therapy. *Behavior Therapy, 10*(1), 111-116. doi:10.1016/S0005-7894(79)80014-3

Fleischman, M. J., & Szykula, S. A. (1981). A community setting replication of a social learning treatment for aggressive children. *Behavior Therapy, 12*(1), 115-122. doi:10.1016/S0005-7894(81)80112-8

Forehand, R., & King, H. (1977). Noncompliant children: Effects of parent training on behavior and attitude change. *Behavior Modification*, *1*(1), 93-108. doi:10.1177/014544557711006

Forehand, R., Sturgis, E. T., McMahon, R. J., Aguar, D. D., Green, K. K., Wells, K. C., & Breiner, J. J. (1979). Parent behavioral training to modify child noncompliance: Treatment generalization across time and from home to school. *Behavior Modification*, *3*(1), 3-25. doi:10.1177/014544557931001

Forgatch, M. S., & Toobert, D. J. (1979). A cost-effective parent training program for use with normal preschool children. *Journal of Pediatric Psychology*, *4*(2), 129-145. doi:10.1093/jpepsy/4.2.129

Forgatch, M. S., & DeGarmo, D. S. (2011). Sustaining fidelity following the nationwide PMTO implementation in Norway. *Prevention Science, 12*(3), 235-246.

Frankel, F., & Simmons, J. Q. (1992). Parent behavioral training: Why and when some parents drop out. *Journal of Clinical Child Psychology*, *21*(4), 322-330. doi:10.1207/s15374424jccp2104_1

Franz, M., Weihrauch, L., & Schäfer, R. (2011). PALME: a preventive parental training program for single mothers with preschool aged children. *Journal of Public Health, 19*(4), 305-319. doi:10.1007/s10389-011-0396-4

Frey, A. J., Small, J., Feil, E., Seeley, J., Walker, H., & Golly, A. (2013). The feasibility of First Step to Success with preschoolers. *Children & Schools, 35*(3), 171-186. doi:10.1093/cs/cdt014

Fung, M. P., Fox, R. A., & Harris, S. E. (2014). Treatment Outcomes for At-Risk Young Children With Behavior Problems: Toward a New Definition of Success. *Journal of Social Service Research, 40*(5), 623-641. doi:10.1080/01488376.2014.915283

Fung, A. C., & Tsang, S. M. (2006). Parent-child parallel-group intervention for childhood aggression in Hong Kong. *Emotional & Behavioural Difficulties, 11(*1), 31-48. doi:10.1080/13632750500393300

Furey, W. M., & Basili, L. A. (1988). Predicting consumer satisfaction in parent training for noncompliant children. *Behavior Therapy*, *19*(4), 555-564. doi:10.1016/S0005-7894(88)80023-6

Gardner, F., Burton, J., & Klimes, I. (2006). Randomised controlled trial of a parenting intervention in the voluntary sector for reducing child conduct problems: outcomes and mechanisms of change. *Journal of Child Psychology & Psychiatry*, *47*(11), 1123-1132. doi:10.1111/j.1469-7610.2006.01668.x

Garvey, C., Julion, W., Fogg, L., Kratovil, A., & Gross, D. (2006). Measuring participation in a prevention trial with parents of young children. *Research in Nursing & Health, 29*(3), 212-222. doi:10.1002/nur.20127

Gaviţa, O. A., David, D., Bujoreanu, S., Tiba, A., & Ionuţiu, D. R. (2012). The efficacy of a short cognitive–behavioral parent program in the treatment of externalizing behavior disorders in Romanian foster care children: Building parental emotion-regulation through unconditional self-and child-acceptance strategies. *Children & Youth Services Review, 34*(7), 1290-1297. doi:10.1016/j.childyouth.2012.03.001

Gerdes, A. C., Haack, L. M., & Schneider, B. W. (2012). Importance of clinically meaningful change: Parental functioning in families of children with ADHD: Evidence for behavioral parent training. *Journal of Attention Disorders, 16*, 147-156.

Ghanizadeh, A., & Shahrivar, F.Z. (2009). The effect of parent management training on children with Attention Deficit Hyperactivity Disorder. *Journal of Child & Adolescent Mental Health, 17*(1), 31-34. doi:10.2989/17280580509486590

Granic, I., O'Hara, A., Pepler, D., & Lewis, M. D. (2007). A dynamic systems analysis of parent-child changes associated with successful 'real-world' interventions for aggressive children. *Journal of Abnormal Child Psychology*, *35*(5), 845-857. doi:10.1007/s10802-007-9133-4

Graziano, P. A., Bagner, D. M., Sheinkopf, S. J., Vohr, B. R., & Lester, B. M. (2012). Evidence-based intervention for young children born premature: Preliminary evidence for associated changes in physiological regulation. *Infant Behavior & Development, 35*(3), 417-428. doi:10.1016/j.infbeh.2012.04.001

Graziano, P. A., Bagner, D. M., Slavec, J., Hungerford, G., Kent, K., Babinski, D., ... & Pasalich, D. (2015). Feasibility of intensive parent–child interaction therapy (I-PCIT): Results from an open trial. *Journal of Psychopathology & Behavioral Assessment*, *37*(1), 1-12. doi:10.1007/s10862-014-9435-0

Griest, D. L., Forehand, R., Rogers, T., Breiner, J., Furey, W., & Williams, C. A. (1982). Effects of parent enhancement therapy on the treatment outcome and generalization of a parent training program. *Behaviour Research & Therapy*, *20*(5), 429-436. doi:10.1016/0005-7967(82)90064-X

Griffin, C., Guerin, S., Sharry, J., & Drumm, M. (2010). A multicentre controlled study of an early intervention parenting programme for young children with behavioural and developmental difficulties. *International Journal Of Clinical & Health Psychology*, *10*(2), 279-294.

Gross, D., Fogg, L., Webster-Stratton, C., Garvey, C., Julion, W., & Grady, J. (2003). Parent training of toddlers in day care in low-income urban communities. *Journal of Consulting & Clinical Psychology, 71*(2), 261-278. doi:10.1037/0022-006X.71.2.261

Gross, D., Garvey, C., Julion, W., Fogg, L., Tucker, S., & Mokros, H. (2009). Efficacy of the Chicago parent program with low-income African American and Latino parents of young children. *Prevention Science, 10*(1), 54-65. doi:10.1007/s11121-008-0116-7

Hagen, K. A., Ogden, T., & Bjørnebekk, G. (2011). Treatment outcomes and mediators of parent management training: A one-year follow-up of children with conduct problems. *Journal of Clinical Child & Adolescent Psychology, 40*(2), 165-178. doi:10.1080/15374416.2011.546050

Hamilton, S. B., & MacQuiddy, S. L. (1984). Self-administered behavioral parent training: Enhancement of treatment efficacy using a time-out signal seat. *Journal of Clinical Child Psychology*, *13*(1), 61-69. doi:10.1080/15374418409533171

Hampson, R. B., Schulte, M. A., & Ricks, C. C. (1983). Individual vs. group training for foster parents: Efficiency/effectiveness evaluations. *Family Relations: An Interdisciplinary Journal Of Applied Family Studies, 32*(2), 191-201. doi:10.2307/584678

Hanisch, C., Freund-Braier, I., Hautmann, C., Jänen, N., Plück, J., Brix, G., ... & Döpfner, M. (2010). Detecting effects of the indicated prevention programme for externalizing problem behaviour (PEP) on child symptoms, parenting, and parental quality of life in a randomized controlled trial. *Behavioural & Cognitive Psychotherapy, 38*(01), 95-112.

Hanisch, C., Hautmann, C., Plück, J., Eichelberger, I., & Döpfner, M. (2014). The prevention program for externalizing problem behavior (PEP) improves child behavior by reducing negative parenting: analysis of mediating processes in a randomized controlled trial. *Journal of Child Psychology & Psychiatry, 55*(5), 473-484. doi:10.1111/jcpp.12177

Harrison, R., Boyle, S. W., & Farley, O. (1999). Evaluating the outcomes of family-based intervention for troubled children: A pretest-posttest study. *Research on Social Work Practice*, *9*(6), 640-655. doi:10.1177/104973159900900602

Harvey, E., Danforth, J. S., Eberhardt McKee, T., Ulaszek, W. R., & Friedman, J. L. (2003). Parenting of children with Attention-Deficit/Hyperactivity Disorder (ADHD): The role of parental ADHD symptomatology. *Journal of Attention Disorders, 7*(1), 31-42. doi:10.1177/108705470300700104

Havighurst, S. S., Wilson, K. R., Harley, A. E., & Prior, M. R. (2009). Tuning into kids: An emotion-focused parenting program—Initial findings from a community trial. *Journal of Community Psychology, 37*(8), 1008-1023. doi:10.1002/jcop.20345

Harwood, M. D., & Eyberg, S. M. (2004). Therapist verbal behavior early in treatment: Relation to successful completion of parent-child interaction therapy. *Journal of Clinical Child & Adolescent Psychology*, *33*(3), 601-612. doi:10.1207/s15374424jccp3303_17

Harwood, M. D., & Eyberg, S. M. (2006). Child-directed interaction: Prediction of change in impaired mother-child functioning. *Journal of Abnormal Child Psychology*, *34*(3), 335-347. doi:10.1007/s10802-006-9025-z

Hautmann, C., Stein, P., Hanisch, C., Eichelberger, I., Plück, J., Walter, D., & Döpfner, M. (2009). Does parent management training for children with externalizing problem behavior in routine care result in clinically significant changes? *Psychotherapy Research*, *19*(2), 224-233. doi:10.1080/10503300902777148

Hautmann, C., Hoijtink, H., Eichelberger, I., Görtz‐Dorten, A., Hanisch, C., Plück, J., ... & Döpfner, M. (2013). Any indication for bias due to participation? Comparison of the effects of a parent management training rated by participating and non‐participating parents. *Clinical Psychology & Psychotherapy, 20*(5), 384-393.

Hautmann, C., Stein, P., Eichelberger, I., Hanisch, C., Plück, J., Walter, D., & Döpfner, M. (2011). The severely impaired do profit most: differential effectiveness of a parent management training for children with externalizing behavior problems in a natural setting. *Journal of Child & Family Studies, 20*(4), 424-435.

Hawes, D. J., & Dadds, M. R. (2005). The treatment of conduct problems in children with callous-unemotional traits. *Journal Of Consulting & Clinical Psychology*, *73*(4), 737-741. doi:10.1037/0022-006X.73.4.737

Heinrichs, N., Bertram, H., Kuschel, A., & Hahlweg, K. (2005). Parent recruitment and retention in a universal prevention program for child behavior and emotional problems: Barriers to research and program participation. *Prevention Science, 6*(4), 275-286. doi:10.1007/s11121-005-0006-1

Helfenbaum-Kun, E. D., & Ortiz, C. (2007). Parent-training groups for fathers of head start children: A pilot study of their feasibility and impact on child behavior and intra-familial relationships. *Child & Family Behavior Therapy*, *29*(2), 47-64. doi:10.1300/J019v29n02_04

Hemphill, S. A., & Littlefield, L. (2001). Evaluation of a short-term group therapy program for children with behavior problems and their parents. *Behaviour Research & Therapy, 39*(7), 823-841. doi:10.1016/S0005-7967(00)00058-9

Herbert, S. D., Harvey, E. A., Roberts, J. L., Wichowski, K., & Lugo-Candelas, C. I. (2013). A randomized controlled trial of a parent training and emotion socialization program for families of hyperactive preschool-aged children. *Behavior Therapy, 44*(2), 302-316. doi:10.1016/j.beth.2012.10.004

Herman, K. C., Borden, L. A., Reinke, W. M., & Webster-Stratton, C. (2011). The impact of the Incredible Years parent, child, and teacher training programs on children's co-occurring internalizing symptoms. *School Psychology Quarterly, 26*(3), 189.

Hiscock, H., Bayer, J. K., Price, A., Ukoumunne, O. C., Rogers, S., & Wake, M. (2008). Universal parenting programme to prevent early childhood behavioural problems: Cluster randomised trial. *British Medical Journal, 336*(7639), 318-321. doi:10.1136/bmj.39451.609676.AE

Ho, T., Chow, V., Fung, C., Leung, K., Chiu, K., Yu, G., & ... Lieh-Mak, F. (1999). Parent management training in a Chinese population: Application and outcome. *Journal pf the American Academy of Child & Adolescent Psychiatry*, *38*(9), 1165-1172. doi:10.1097/00004583-199909000-00022

Hoath, F. E., & Sanders, M. R. (2002). A feasibility study of enhanced group Triple P - Positive Parenting Program for parents of children with Attention-deficit/Hyperactivity Disorder. *Behaviour Change*, *19*(4), 191-206. doi:10.1375/bech.19.4.191

Hobbel, S., & Drugli, M. B. (2013). Symptom changes of Oppositional Defiant Disorder after treatment with the Incredible Years Program. *Nordic Journal of Psychiatry, 67*(2), 97-103.

Högström, J., Enebrink, P., & Ghaderi, A. (2013). The moderating role of child callous-unemotional traits in an Internet-based parent-management training program. *Journal of Family Psychology, 27*(2), 314. doi:10.1037/a0031883

Holtz, C. A., Carrasco, J. M., Mattek, R. J., & Fox, R. A. (2009). Behavior problems in toddlers with and without developmental delays: Comparison of treatment outcomes. *Child & Family Behavior Therapy, 31*(4), 292-311. doi:10.1080/07317100903311018

Horn, W. F., Ialongo, N. S., Pascoe, J. M., Greenberg, G., Packard, T., Lopez, M., Wagner, A., & Puttler, L. (1991). Additive effects of psychostimulants, parent training, and self-control therapy with ADHD children. *Journal of the American Academy of Child & Adolescent Psychiatry*, *30*(2), 233-240. doi:10.1097/00004583-199103000-00011

Horn, W. F., Ialongo, N., Popovich, S., & Peradotto, D. (1987). Behavioral parent training and cognitive-behavioral self-control therapy with ADD-H children: Comparative and combined effects. *Journal of Clinical Child Psychology*, *16*(1), 57-68. doi:10.1207/s15374424jccp1601_8

Horn, W. F., Ialongo, N., Greenberg, G., Packard, T., & Smith-Winberry, C. (1990). Additive effects of behavioral parent training and self-control therapy with attention deficit hyperactivity disordered children. *Journal of Clinical Child Psychology*, *19*(2), 98-110. doi:10.1207/s15374424jccp1902_1

Huang, H., Chao, C., Tu, C., & Yang, P. (2003). Behavioral parent training for Taiwanese parents of children with attention-deficit/hyperactivity disorder. *Psychiatry & Clinical Neurosciences*, *57*(3), 275-281. doi:10.1046/j.1440-1819.2003.01117.x

Hukkelberg, S. S., & Ogden, T. (2013). Working alliance and treatment fidelity as predictors of externalizing problem behaviors in parent management training. *Journal of Consulting & Clinical Psychology, 81*(6), 1010.

Hughes, R. C., & Wilson, P. H. (1988). Behavioral parent training: Contingency management versus communication skills training with or without the participation of the child. *Child & Family Behavior Therapy*, *10*(4), 11-23. doi:10.1300/J019v10n04_02

Hutchings, J. (1996). Evaluating a behaviourally based parent training group: Outcomes for parents, children and health visitors. *Behavioural & Cognitive Psychotherapy*, *24*(2), 149-170. doi:10.1017/S1352465800017410

Hutchings, J., Appleton, P., Smith, M., Lane, E., & Nash, S. (2002). Evaluation of two treatments for children with severe behaviour problems: Child behaviour and maternal mental health outcomes. *Behavioural & Cognitive Psychotherapy, 30*(3), 279-295. doi:10.1017/S1352465802003041

Hutchings, J., Bywater, T., Williams, M. E., Whitaker, C., Lane, E., & Shakespeare, K. (2011). The extended school aged Incredible Years parent programme. *Child & Adolescent Mental Health, 16*(3), 136-143.

Hutchings, J., Gardner, F., Bywater, T., Daley, D., Whitaker, C., Jones, K., & ... Edwards, R. T. (2007). Parenting intervention in Sure Start services for children at risk of developing conduct disorder: Pragmatic randomised controlled trial. *British Medical Journal*, *334*(7595), 678. doi:10.1136/bmj.39126.620799.55

Ireland, J. L., Sanders, M. R., & Markie-Dadds, C. (2003). The impact of parent training on marital functioning: A comparison of two group versions of the Triple P-positive parenting program for parents of children with early-onset conduct problems. *Behavioural & Cognitive Psychotherapy, 31*(2), 127-142. doi:10.1017/S1352465803002017

Jensen, S. A., & Grimes, L. K. (2010). Increases in parent attendance to behavioral parent training due to concurrent child treatment groups. *Child & Youth Care Forum*, *39*(4), 239-251. doi:10.1007/s10566-010-9101-y

Karoly, P., & Rosenthal, M. (1977). Training parents in behavior modification: Effects on perceptions of family interaction and deviant child behavior. *Behavior Therapy*, *8*(3), 406-410. doi:10.1016/S0005-7894(77)80076-2

Kazdin, A. E., & Wassell, G. (2000). Predictors of barriers to treatment and therapeutic change in outpatient therapy for antisocial children and their families. *Mental Health Services Research*, *2*(1), 27-40. doi:10.1023/A:1010191807861

Kazdin, A. E., & Whitley, M. K. (2006). Pretreatment social relations, therapeutic alliance, and improvements in parenting practices in parent management training. *Journal of Consulting & Clinical Psychology*, *74*(2), 346-355. doi:10.1037/0022-006X.74.2.346

Kazdin, A. E., Esveldt-Dawson, K., French, N. H., & Unis, A. S. (1987). Effects of parent management training and problem-solving skills training combined in the treatment of antisocial child behavior. *Journal of the American Academy of Child & Adolescent Psychiatry*, *26*(3), 416-424. doi:10.1097/00004583-198705000-00024

Kern, L., DuPaul, G. J., Volpe, R. J., Sokol, N. G., Lutz, J., Arbolino, L. A., & ... VanBrakle, J. D. (2007). Multisetting assessment-based intervention for young children at risk for attention deficit hyperactivity disorder: Initial effects on academic and behavioral functioning. *School Psychology Review*, *36*(2), 237-255.

Kierfeld, F., Ise, E., Hanisch, C., Görtz-Dorten, A., & Döpfner, M. (2013). Effectiveness of telephone-assisted parent-administered behavioural family intervention for preschool children with externalizing problem behaviour: A randomized controlled trial. *European Child & Adolescent Psychiatry, 22*(9), 553-565. doi:10.1007/s00787-013-0397-7

Kimonis, E. R., Bagner, D. M., Linares, D., Blake, C. A., & Rodriguez, G. (2014). Parent training outcomes among young children with callous–unemotional conduct problems with or at risk for developmental delay. *Journal of Child & Family Studies, 23*(2), 437-448. doi:10.1007/s10826-013-9756-8

Kjøbli, J., Hukkelberg, S., & Ogden, T. (2013). A randomized trial of group parent training: Reducing child conduct problems in real-world settings. *Behaviour Research & Therapy, 51*(3), 113-121. doi:10.1016/j.brat.2012.11.006

Kjøbli, J., & Ogden, T. (2009). Gender differences in intake characteristics and behavior change among children in families receiving parent management training. *Children & Youth Services Review*, *31*(8), 823-830. doi:10.1016/j.childyouth.2009.03.004

Kjøbli, J., & Ogden, T. (2012). A randomized effectiveness trial of brief parent training in primary care settings. *Prevention Science, 13*(6), 616-626. doi:10.1007/s11121-012

Kling, Å., Forster, M., Sundell, K., & Melin, L. (2010). A randomized controlled effectiveness trial of parent management training with varying degrees of therapist support. *Behavior Therapy, 41*(4), 530-542. doi:10.1016/j.beth.2010.02.004

Knapp, P. A., & Deluty, R. H. (1989). Relative effectiveness of two behavioral parent training programs. *Journal of Clinical Child Psychology*, *18*(4), 314-322. doi:10.1207/s15374424jccp1804_4

Kratochwill, T. R., Elliott, S. N., Loitz, P., Sladeczek, I., & Carlson, J. S. (2003). Conjoint consultation using self-administered manual and videotape parent-teacher training: Effects on children's behavioral difficulties. *School Psychology Quarterly*, *18*(3), 269-302. doi:10.1521/scpq.18.3.269.22574

Lakes, K. D., Kettler, R. J., Schmidt, J., Haynes, M., Feeney-Kettler, K., Kamptner, L., & ... Tamm, L. (2009). The CUIDAR early intervention parent training program for preschoolers at risk for behavioral disorders: An innovative practice for reducing disparities in access to service. *Journal of Early Intervention, 31*(2), 167-178. doi:10.1177/1053815109331861

Lakes, K. D., Vargas, D., Riggs, M., Schmidt, J., & Baird, M. (2011). Parenting intervention to reduce attention and behavior difficulties in preschoolers: A CUIDAR evaluation study. *Journal of Child & Family Studies, 20*(5), 648-659. doi:10.1007/s10826-010-9440-1

Lanier, P., Kohl, P. L., Benz, J., Swinger, D., Moussette, P., & Drake, B. (2011). Parent–child interaction therapy in a community setting: Examining outcomes, attrition, and treatment setting. *Research on Social Work Practice, 21*(6), 689-698. doi:10.1177/1049731511406551

Lanier, P., Kohl, P. L., Benz, J., Swinger, D., Moussette, P., & Drake, B. (2011). Parent–child interaction therapy in a community setting: Examining outcomes, attrition, and treatment setting. *Research on Social Work Practice, 21*(6), 689-698. doi:10.1177/1049731511406551

Larsson, B., Fossum, S., Clifford, G., Drugli, M., Handegård, B., & Mørch, W. (2009). Treatment of oppositional defiant and conduct problems in young Norwegian children: Results of a randomized controlled trial. *European Child & Adolescent Psychiatry*, *18*(1), 42-52. doi:10.1007/s00787-008-0702-z

Lau, A. S., Fung, J. J., Ho, L. Y., Liu, L. L., & Gudiño, O. G. (2011). Parent training with high-risk immigrant Chinese families: A pilot group randomized trial yielding practice-based evidence. *Behavior Therapy, 42*(3), 413-426. doi:10.1016/j.beth.2010.11.001

Lavigne, J. V., LeBailly, S. A., Gouze, K. R., Binns, H. J., Keller, J., & Pate, L. (2010). Predictors and correlates of completing behavioral parent training for the treatment of oppositional defiant disorder in pediatric primary care. *Behavior Therapy*, *41*(2), 198-211. doi:10.1016/j.beth.2009.02.006

Lavigne, J. V., LeBailly, S. A., Gouze, K. R., Cicchetti, C., Pochyly, J., Arend, R., & ... Binns, H. J. (2008). Treating oppositional defiant disorder in primary care: A comparison of three models. *Journal of Pediatric Psychology*, *33*(5), 449-461. doi:10.1093/jpepsy/jsm074

Leathers, S. J., Spielfogel, J. E., McMeel, L. S., & Atkins, M. S. (2011). Use of a parent management training intervention with urban foster parents: A pilot study. *Children & Youth Services Review, 33*(7), 1270-1279. doi:10.1016/j.childyouth.2011.02.022

Lees, D. G., & Ronan, K. R. (2008). Engagement and effectiveness of parent management training (incredible years) for solo high-risk mothers: A multiple baseline evaluation. *Behaviour Change*, *25*(2), 109-128. doi:10.1375/bech.25.2.109

Letarte, M., Normandeau, S., & Allard, J. (2010). Effectiveness of a parent training program “incredible years” in a child protection service. *Child Abuse & Neglect, 34*(4), 253-261. doi:10.1016/j.chiabu.2009.06.003

Leung, C., Sanders, M. R., Leung, S., Mak, R., & Lau, J. (2003). An outcome evaluation of the implementation of the triple P-Positive Parenting Program in Hong Kong. *Family Process, 42*(4), 531-544. doi:10.1111/j.1545-5300.2003.00531.x

Leung, C., Tsang, S., Heung, K., & Yiu, I. (2009). Effectiveness of Parent—Child Interaction Therapy (PCIT) among Chinese families. *Research On Social Work Practice*, *19*(3), 304-313. doi:10.1177/1049731508321713

Lewis, W. M. (1986). Group training for parents of children with behavior problems. *Journal for Specialists in Group Work, 11*(4), 194-199. doi:10.1080/01933928608411856

Lundeen, R. (1977). Modifying children's misbehavior through parent workshops. *Journal of Clinical Child Psychology*, *6*(1), 36-37. doi:10.1080/15374417709532741

MacKenzie, E. P., Fite, P. J., & Bates, J. E. (2004). Predicting Outcome in Behavioral Parent Training: Expected and Unexpected Results. *Child & Family Behavior Therapy, 26*(2), 37-53. doi:10.1300/J019v26n02_03

MacKenzie, E. P., & Hilgedick, J. M. (1999). The Computer-Assisted Parenting Program (CAPP): The use of a computerized behavioral parent training program as an educational tool. *Child & Family Behavior Therapy*, *21*(4), 23-44. doi:10.1300/J019v21n04_02

Malik, T. A., & Tariq, N. (2014). Parent training in reduction of Attention-Deficit/Hyperactivity Disorder and Oppositional Defiant Disorder symptoms in children. *Pakistan Journal of Psychological Research, 29*(1), 151-169.

Malti, T., Ribeaud, D., & Eisner, M. P. (2011). The effectiveness of two universal preventive interventions in reducing children's externalizing behavior: A cluster randomized controlled trial. *Journal of Clinical Child & Adolescent Psychology, 40*(5), 677-692. doi:10.1080/15374416.2011.597084

Markie-Dadds, C., & Sanders, M. R. (2006). Self-directed Triple P (Positive Parenting Program) for mothers with children at-Risk of developing conduct problems. *Behavioural & Cognitive Psychotherapy*, *34*(3), 259-275. doi:10.1017/S1352465806002797

Martinez, C. r., & Eddy, J. (2005). Effects of culturally adapted parent management training on Latino youth behavioral health outcomes. *Journal of Consulting & Clinical Psychology*, *73*(5), 841-851. doi:10.1037/0022-006X.73.5.841

Matos, M., Bauermeister, J. J., & Bernal, G. (2009). Parent-child interaction therapy for Puerto Rican preschool children with ADHD and behavior problems: A pilot efficacy study. *Family Process*, *48*(2), 232-252. doi:10.1111/j.1545-5300.2009.01279.x

Matos, M., Torres, R., Santiago, R., Jurado, M., & Rodríguez, I. (2006). Adaptation of parent-child interaction therapy for Puerto Rican families: A preliminary study. *Family Process, 45*(2), 205-222. doi:10.1111/j.1545-5300.2006.00091.x

Matsumoto, Y., Sofronoff, K., & Sanders, M. R. (2007). The efficacy and acceptability of the Triple P-Positive Parenting Program with Japanese parents. *Behaviour Change, 24*(4), 205-218. doi:10.1375/bech.24.4.205

McCabe, K., & Yeh, M. (2009). Parent-child interaction therapy for Mexican Americans: A randomized clinical trial. *Journal of Clinical Child & Adolescent Psychology, 38*(5), 753-759. doi:10.1080/15374410903103544

McGilloway, S., Mhaille, G. N., Bywater, T., Furlong, M., Leckey, Y., Kelly, P., & ... Donnelly, M. (2012). A parenting intervention for childhood behavioral problems: A randomized controlled trial in disadvantaged community-based settings. *Journal of Consulting & Clinical Psychology, 80*(1), 116-127. doi:10.1037/a0026304

McKee, T., Harvey, E., Danforth, J. S., Ulaszek, W. R., & Friedman, J. L. (2004). The relation between parental coping styles and parent-child interactions before and after treatment for children with ADHD and Oppositional Behavior. *Journal of Clinical Child & Adolescent Psychology*, *33*(1), 158-168. doi:10.1207/S15374424JCCP3301_15

McMahon, Forehand, & Griest (1981). Effects of knowledge of social learning principles on enhancing treatment outcome and generalization in a parent training program. J*ournal of Consulting & Clinical Psychology, 49*, 526-532. doi:10.1037/0022-006X.49.4.526

McMahon, Forehand, Griest, & Wells (1981). Who drops of of parent behavioral training? *Behavioral Counseling Quarterly*, 1, 79-85.

McNeil, C. B., Eyberg, S., Eisenstadt, T. H., Newcomb, K., & Funderburk, B. (1991). Parent-child interaction therapy with behavior problem children: Generalization of treatment effects to the school setting. *Journal of Clinical Child Psychology, 20*(2), 140-151. doi:10.1207/s15374424jccp2002_5

McNeil, C. B., Herschell, A. D., Gurwitch, R. H., & Clemens-Mowrer, L. (2005). Training foster parents in parent-child interaction therapy. *Education & Treatment of Children*, *28*(2), 182-196.

Menting, A. A., de Castro, B. O., Wijngaards-de Meij, L. V., & Matthys, W. (2014). A trial of parent training for mothers being released from incarceration and their children. *Journal of Clinical Child & Adolescent Psychology, 43*(3), 381-396. doi:10.1080/15374416.2013.817310

Miller, G. E., & Prinz, R. J. (2003). Engagement of families in treatment for childhood conduct problems. *Behavior Therapy*, *34*(4), 517-534. doi:10.1016/S0005-7894(03)80033-3

Morawska, A., & Sanders, M. R. (2006). Self-administered behavioural family intervention for parents of toddlers: Effectiveness and dissemination. *Behaviour Research & Therapy*, *44*(12), 1839-1848. doi:10.1016/j.brat.2005.11.015

Morawska, A., & Sanders, M. (2009). An evaluation of a behavioural parenting intervention for parents of gifted children. *Behaviour Research & Therapy, 47*(6), 463-470. doi:10.1016/j.brat.2009.02.008

Morawska, A., Haslam, D., Milne, D., & Sanders, M. R. (2011). Evaluation of a brief parenting discussion group for parents of young children. *Journal of Developmental & Behavioral Pediatrics, 32*(2), 136-145. doi:10.1097/DBP.0b013e3181f17a28

Mullin, E., Proudfoot, R., & Glanville, B. (1990). Group parent training in the Eastern Health Board: Programme description and evaluation. *The Irish Journal of Psychology*, *11*(4), 342-353.

Mullin, E., Quigley, K., & Glanville, B. (1994). A controlled evaluation of the impact of a parent training programme on child behaviour and mothers' general well-being. *Counselling Psychology Quarterly*, *7*(2), 167-180. doi:10.1080/09515079408254143

Myers, H. F., Alvy, K. T., Arrington, A., Richardson, M. A., Marigna, M., Huff, R., & ... Newcomb, M. D. (1992). The impact of a parent training program on inner-city African-American families. *Journal Of Community Psychology*, *20*(2), 132-147. doi:10.1002/1520-6629(199204)20:2&lt;132::AID-JCOP2290200204&gt;3.0.CO;2-Z

Niccols, A. (2009). Immediate and short-term outcomes of the 'COPEing with Toddler Behaviour' parent group. *Journal of Child Psychology & Psychiatry, 50*(5), 617-626. doi:10.1111/j.1469-7610.2008.02007.x

Nicholson, J. M., & Sanders, M. R. (1999). Randomized controlled trial of behavioral family intervention for the treatment of child behavior problems in stepfamilies. *Journal of Divorce & Remarriage*, *30*(3-4), 1-23. doi:10.1300/J087v30n03_01

Nidiffer, F. Don.(1980). Inhibiting discrimination of skills as a strategy for obtaining transfer of parent training. *Child Behavior Therapy, 2*, pp. 57-66.

Nieter, L., Thornberry, T. J., & Brestan-Knight, E. (2013). The effectiveness of group parent–child interaction therapy with community families. *Journal of Child & Family Studies, 22*(4), 490-501. doi:10.1007/s10826-012-9601-5

Nilsen, W. (2007). Fostering futures: A preventive intervention program for school-age children in foster care. *Clinical Child Psychology &Psychiatry*, *12*(1), 45-63. doi:10.1177/1359104507071055

Nix, R. L., Bierman, K. L., & McMahon, R. J. (2009). How attendance and quality of participation affect treatment response to parent management training. *Journal of Consulting & Clinical Psychology*, *77*(3), 429-438. doi:10.1037/a0015028

Nixon, R. V., Sweeney, L., Erickson, D. B., & Touyz, S. W. (2003). Parent-child interaction therapy: A comparison of standard and abbreviated treatments for oppositional defiant preschoolers. *Journal of Consulting & Clinical Psychology*, *71*(2), 251-260. doi:10.1037/0022-006X.71.2.251

Nock, M. K., & Kazdin, A. E. (2005). Randomized controlled trial of a brief intervention for increasing participation in parent management training. *Journal of Consulting & Clinical Psychology*, *73*(5), 872-879. doi:10.1037/0022-006X.73.5.872

Orrell-Valente, J. K., Pinderhughes, E. E., Valente, E. J., & Laird, R. D. (1999). If it's offered, will they come? Influences on parents' participation in a community-based conduct problems prevention program. *American Journal of Community Psychology, 27*(6), 753-783. doi:10.1023/A:1022258525075

Östberg, M., & Rydell, A. (2012). An efficacy study of a combined parent and teacher management training programme for children with ADHD. *Nordic Journal of Psychiatry, 66*(2), 123-130. doi:10.3109/08039488.2011.641587

Oveisi, S., Ardabili, H., Dadds, M. R., Majdzadeh, R., Mohammadkhani, P., Rad, J., & Shahrivar, Z. (2010). Primary prevention of parent-child conflict and abuse in Iranian mothers: A randomized-controlled trial. *Child Abuse & Neglect*, *34*(3), 206-213. doi:10.1016/j.chiabu.2009.05.008

Pade, H., Taube, D. O., Aalborg, A. E., & Reiser, P. J. (2006). An immediate and long-term study of a temperament and parent-child interaction therapy based community program for preschoolers with behavior problems. *Child & Family Behavior Therapy*, *28*(3), 1-28. doi:10.1300/J019v28n03_01

Pancer, S. M., Nelson, G., Hasford, J., & Loomis, C. (2013). The better beginnings, better futures project: Long‐term parent, family, and community outcomes of a universal, comprehensive, community‐based prevention approach for primary school children and their families. *Journal of Community & Applied Social Psychology, 23*(3), 187-205. doi:10.1002/casp.2110

Patterson, G. R., DeGarmo, D., & Forgatch, M. (2004). Systematic changes in families following prevention trials. *Journal of Abnormal Child Psychology*, *32*(6), 621-633. doi:10.1023/B:JACP.0000047211.11826.54

Patterson, G. R., Chamberlain, P., & Reid, J. B. (1982). A comparative evaluation of a parent-training program. *Behavior Therapy*, *13*(5), 638-650. doi:10.1016/S0005-7894(82)80021-X

Peed, S., Roberts, M., & Forehand, R. (1977). Evaluation of the effectiveness of a standardized parent training program in altering the interaction of mothers and their noncompliant children. *Behavior Modification*, *1*(3), 323-350. doi:10.1177/014544557713003

Peters, S., Calam, R., & Harrington, R. (2005). Maternal attributions and expressed emotion as predictors of attendance at parent management training. *Journal of Child Psychology & Psychiatry*, *46*(4), 436-448. doi:10.1111/j.1469-7610.2004.00365.x

Pevsner, R. (1982). Group parent training versus individual family therapy: An outcome study. *Journal of Behavior Therapy & Experimental Psychiatry, 13*(2), 119-122. doi:10.1016/0005-7916(82)90052-0

Pfiffner, L. J., Hinshaw, S. P., Owens, E., Zalecki, C., Kaiser, N. M., Villodas, M., & McBurnett, K. (2014). A two-site randomized clinical trial of integrated psychosocial treatment for ADHD-inattentive type. *Journal of Consulting & Clinical Psychology, 82*(6), 1115-1127. doi:10.1037/a0036887

Pfiffner, L. J., Jouriles, E. N., Brown, M. M., Etscheidt, M. A., & Kelly, J. A. (1990). Effects of problem-solving therapy on outcomes of parent training for single-parent families. *Child & Family Behavior Therapy, 12*(1), 1-11. doi:10.1300/J019v12n01_01

Phillips, J., Morgan, S., Cawthorne, K., & Barnett, B. (2008). Pilot evaluation of parent–child interaction therapy delivered in an Australian community early childhood clinic setting. *Australian & New Zealand Journal of Psychiatry, 42*(8), 712-719. doi:10.1080/00048670802206320

Piehler, T. F., Lee, S. S., Bloomquist, M. L., & August, G. J. (2014). Moderating effects of parental well-being on parenting efficacy outcomes by intervention delivery model of the early risers conduct problems prevention program. *Journal of Primary Prevention, 35*(5), 321-337. doi:10.1007/s10935-014-0358-z

Pisterman, S., Firestone, P., McGrath, P., Goodman, J. T., Webster, I., Mallory, R., & Goffin, B. (1992). The role of parent training in treatment of preschoolers with ADDH. *American Journal of Orthopsychiatry*, *62*(3), 397-408. doi:10.1037/h0079356

Pisterman, S., McGrath, P., Firestone, P., Goodman, J. T., Webster, I., & Mallory, R. (1989). Outcome of parent-mediated treatment of preschoolers with attention deficit disorder with hyperactivity. *Journal Of Consulting & Clinical Psychology*, *57*(5), 628-635. doi:10.1037/0022-006X.57.5.628

Porzig-Drummond, R., Stevenson, R. J., & Stevenson, C. (2014). The 1-2-3 Magic parenting program and its effect on child problem behaviors and dysfunctional parenting: A randomized controlled trial. *Behaviour Research & Therapy*, 5852-64. doi:10.1016/j.brat.2014.05.004

Reedtz, C., Handegård, B. H., & Mørch, W. (2011). Promoting positive parenting practices in primary pare: Outcomes and mechanisms of change in a randomized controlled risk reduction trial. *Scandinavian Journal of Psychology, 52*(2), 131-137. doi:10.1111/j.1467-9450.2010.00854.x

Reid, J. B., Eddy, J., Fetrow, R., & Stoolmiller, M. (1999). Description and immediate impacts of a preventive intervention for conduct problems. *American Journal of Community Psychology*, *27*(4), 483-517. doi:10.1023/A:1022181111368

Rinn, Markle, & Wise. (1981). Positive parent training for foster parents: A one-year follow-up. *Behavioral Counseling Quarterly, 1,* 213-220.

Rogers, H., Cann, W., Cameron, D., Littlefield, L., & Lagioia, V. (2003). Evaluation of the family intervention service for children presenting with characteristics associated with Attention Deficit Hyperactivity Disorder. *Australian E-Journal for the Advancement of Mental Health, 2*(3), 216. doi:10.5172/jamh.2.3.216

Rose, Sheldon D. (1974). Training parents in groups as behavior modifiers of their mentally retarded children. *Journal of Behavior Therapy and Experimental Psychiatry, 5*(2), 135-140

Routh, C. P., Hill, J. W., Steele, H., Elliott, C. E., & Dewey, M. E. (1995). Maternal attachment status, psychosocial stressors and problem behaviour: Follow-up after parent training courses for conduct disorder. *Child Psychology & Psychiatry & Allied Disciplines*, *36*(7), 1179-1198. doi:10.1111/j.1469-7610.1995.tb01364.x

Sadler, O. W., Seyden, T., Howe, B., & Kaminsky, T. (1976). An evaluation of groups for parents: A standardized format encompassing both behavior modification and humanistic methods. *Journal of Community Psychology, 4(*2), 157-163. doi:10.1002/1520-6629(197604)4:2&lt;157::AID-JCOP2290040210&gt;3.0.CO;2-Y

Salmon, K., Dadds, M. R., Allen, J., & Hawes, D. J. (2009). Can emotional language skills be taught during parent training for conduct problem children?. *Child Psychiatry & Human Development*, *40*(4), 485-498. doi:10.1007/s10578-009-0139-8

Salmon, K., Dittman, C., Sanders, M., Burson, R., & Hammington, J. (2014). Does adding an emotion component enhance the Triple P− Positive Parenting Program? *Journal of Family Psychology, 28*(2), 244.

Sanders, M. R., Baker, S., & Turner, K. M. (2012). A randomized controlled trial evaluating the efficacy of Triple P online with parents of children with early-onset conduct problems. *Behaviour Research &Therapy, 50*(11), 675-684.

Sanders, M. R., Bor, W., & Morawska, A. (2007). Maintenance of treatment gains: A comparison of enhanced, standard, and self-directed Triple P-Positive parenting program. *Journal of Abnormal Child Psychology*, *35*(6), 983-998. doi:10.1007/s10802-007-9148-x

Scahill, L., Sukhodolsky, D. G., Bearss, K., Findley, D., Hamrin, V., Carroll, D. H., & Rains, A. L. (2006). Randomized trial of parent management training in children with tic disorders and disruptive behavior. *Journal of Child Neurology*, *21*(8), 650-656. doi:10.1177/08830738060210080201

Schuhmann, E. M., Foote, R. C., Eyberg, S. M., Boggs, S. R., & Algina, J. (1998). Efficacy of parent–child interaction therapy: Interim report of a randomized trial with short-term maintenance. *Journal of Clinical Child Psychology*, *27*(1), 34-45. doi:10.1207/s15374424jccp2701_4

Scott, S., & O’Connor, T. G. (2012). An experimental test of differential susceptibility to parenting among emotionally-dysregulated children in a randomized controlled trial for oppositional behavior. *Journal of Child Psychology & Psychiatry, 53*(11), 1184-1193. doi:10.1111/j.1469-7610.2012.02586.x

Scott, S., Spender, Q., Doolan, M., Jacobs, B., & Aspland, H. (2001). Multicentre controlled trial of parenting groups for childhood antisocial behaviour in clinical practice. *British Medical Journal*, *323*(7306), 194. doi:10.1136/bmj.323.7306.194

Shaffer, A., Lindhiem, O., Kolko, D. J., & Trentacosta, C. J. (2013). Bidirectional relations between parenting practices and child externalizing behavior: A cross-lagged panel analysis in the context of a psychosocial treatment and 3-year follow-up. *Journal of Abnormal Child Psychology, 41*(2), 199-210. doi:10.1007/s10802-012-9670-3

Shapiro, J. P., Youngstrom, J. K., Youngstrom, E. A., & Marcinick, H. F. (2012). Transporting a manualized treatment for children’s disruptive behavior to a community clinic. *Journal of Contemporary Psychotherapy, 42*(4), 215-225. doi:10.1007/s10879-012-9206-8

Sharry, J., Guerin, S., Griffin, C., & Drumm, M. (2005). An Evaluation of the Parents Plus Early Years Programme: A video-based early intervention for parents of pre-school children with behavioural and developmental difficulties. *Clinical Child Psychology & Psychiatry*, *10*(3), 319-336. doi:10.1177/1359104505053752

Sibaja, M. A.D., Moreno, M. I. C., & Garcia, M. I. D. (2011). Programa EDUCA. Escuela de padres para el tratamiento de los trastornos del comportamiento perturbador. *Apuntes de Psicología, 29*(2), 243-258.

Sigmarsdóttir, M., Degarmo, D. S., Forgatch, M. S., & Guðmundsdóttir, E. V. (2013). Treatment effectiveness of PMTO for children's behavior problems in Iceland: Assessing parenting practices in a randomized controlled trial. *Scandinavian Journal of Psychology, 54*(6), 468-476.

Smith, M. D., & Barrett, M. S. (2000). Parenting training for families of girls with attention deficit hyperactivity disorder: An analysis of three cases. *Child & Family Behavior Therapy*, *22*(4), 41-54. doi:10.1300/J019v22n04_04

Solomon, M., Ono, M., Timmer, S., & Goodlin-Jones, B. (2008). The effectiveness of parent--child interaction therapy for families of children on the autism spectrum. *Journal of Autism & Developmental Disorders*, *38*(9), 1767-1776. doi:10.1007/s10803-008-0567-5

Somech, L. Y., & Elizur, Y. (2012). Promoting self-regulation and cooperation in pre-kindergarten children with conduct problems: A randomized controlled trial. J*ournal of the American Academy of Child & Adolescent Psychiatry, 51*(4), 412-422.

Sonuga-Barke,E.J.S.,Thompson,M.,Daley,D.,& Laver-Bradbury, C. (2004). Parent training for attention-deficit/hyperactivity disorder: Is it as effective when delivered as routine rather than specialist care? *British Journal of Clinical Psychology, 43*, 449-457. doi: 2005-02273-00910.1348/0144665042388973

Springer, C., & Reddy, L. A. (2010). Measuring parental treatment adherence in a multimodal treatment program for children with ADHD: A preliminary investigation. *Child & Family Behavior Therapy, 32*(4), 272-290. doi:10.1080/07317107.2010.515522

Stallman, H. M., & Sanders, M. R. (2014). A randomized controlled trial of family transitions Triple P: A group-administered parenting program to minimize the adverse effects of parental divorce on children. *Journal of Divorce & Remarriage, 55*(1), 33-48. doi:10.1080/10502556.2013.862091

Stein, D. B. (1999). A medication-free parent management program for children diagnosed as ADHD. *Ethical Human Sciences & Services*, *1*(1), 61-79.

Stewart, L. S., & Carlson, J. S. (2010). Investigating parental acceptability of the incredible years self-administered parent training program for children presenting externalizing behavior problems. *Journal of Applied School Psychology, 26*(2), 162-175. doi:10.1080/15377901003709369

Storebø, O. J., Gluud, C., Winkel, P., & Simonsen, E. (2012). Social-skills and parental training plus standard treatment versus standard treatment for children with ADHD – The randomised SOSTRA Trial. *Plos ONE, 7(*6), doi:10.1371/journal.pone.0037280

Sumargi, A., Sofronoff, K., & Morawska, A. (2014). Evaluation of a brief format of the triple P-positive parenting program: A pilot study with Indonesian parents residing in Australia. *Behaviour Change, 31*(2), 144-158. doi:10.1017/bec.2014.7

Sutton, C. (1995). Parent training by telephone: A partial replication! *Behavioural & Cognitive Psychotherapy*, *23*(1), 1-24. doi:10.1017/S1352465800017598

Taylor, T. K., Webster-Stratton, C., Feil, E. G., Broadbent, B., Widdop, C. S., & Severson, H. H. (2008). Computer-based intervention with coaching: An example using the Incredible Years program. *Cognitive Behaviour Therapy*, *37*(4), 233-246. doi:10.1080/16506070802364511

Taylor, T. K., Schmidt, F., Pepler, D., & Hodgins, C. (1998). A comparison of eclectic treatment with Webster-Stratton's parents and children series in a children's mental health center: A randomized controlled trial. *Behavior Therapy*, *29*(2), 221-240. doi:10.1016/S0005-7894(98)80004-X

Thompson, R. W., Ruma, P. R., Schuchmann, L. F., & Burke, R. V. (1996). A cost-effectiveness evaluation of parent training. *Journal of Child & Family Studies*, *5*(4), 415-429. doi:10.1007/BF02233863

Thompson, R. W., Ruma, P. R., Brewster, A. L., Besetsney, L. K., & Burke, R. V. (1997). Evaluation of an Air Force child physical abuse prevention project using the reliable change index. *Journal of Child & Family Studies*, *6*(4), 421-434. doi:10.1023/A:1025093328618

Thornton, S., & Calam, R. (2011). Predicting intention to attend and actual attendance at a universal parent-training programme: A comparison of social cognition models. *Clinical Child Psychology & Psychiatry, 16*(3), 365-383. doi:10.1177/1359104510366278

Timmer, S. G., Ho, L. L., Urquiza, A. J., Zebell, N. M., y Garcia, E. F., & Boys, D. (2011). The effectiveness of parent–child interaction therapy with depressive mothers: The changing relationship as the agent of individual change. *Child Psychiatry & Human Development, 42*(4), 406-423. doi:10.1007/s10578-011-0226-5

Timmer, S. G., Sedlar, G., & Urquiza, A. J. (2004). Challenging children in kin versus nonkin foster care: Perceived costs and benefits to caregivers. *Child Maltreatment*, *9*(3), 251-262. doi:10.1177/1077559504266998

Timmer, S. G., Urquiza, A. J., Zebell, N. M., & McGrath, J. M. (2005). Parent-child interaction therapy: Application to maltreating parent-child dyads. *Child Abuse & Neglect*, *29*(7), 825-842. doi:10.1016/j.chiabu.2005.01.003

Trillingsgaard, T., Trillingsgaard, A., & Webster‐Stratton, C. (2014). Assessing the effectiveness of the ‘Incredible Years parent training’ to parents of young children with ADHD symptoms—A preliminary report. *Scandinavian Journal of Psychology, 55*(6), 538-545. doi:10.1111/sjop.12155

Turner, K. T., & Sanders, M. R. (2006). Help when it's needed first: A controlled evaluation of brief, preventive behavioral family intervention in a primary care setting. *Behavior Therapy*, *37*(2), 131-142. doi:10.1016/j.beth.2005.05.004

Tynan, W. D., Chew, C., & Algermissen, M. (2004). Concurrent parent and child therapy groups for externalizing disorders: The rural replication. *Cognitive & Behavioral Practice, 11*(1), 99-101. doi:10.1016/S1077-7229(04)80012-9

van den Hoofdakker, B. J., Hoekstra, P. J., van der Veen-Mulders, L., Sytema, S., Emmelkamp, P. G., Minderaa, R. B., & Nauta, M. H. (2014). Paternal influences on treatment outcome of behavioral parent training in children with attention-deficit/hyperactivity disorder. *European Child & Adolescent Psychiatry, 23*(11), 1071-1079. doi:10.1007/s00787-014-0557-4

van den Hoofdakker, B. J., van der Veen-Mulders, L., Sytema, S., Emmelkamp, P. G., Minderaa, R. B., & Nauta, M. H. (2007). Effectiveness of behavioral parent training for children with ADHD in routine clinical practice: A randomized controlled study. *Journal of the American Academy Of Child & Adolescent Psychiatry*, *46*(10), 1263-1271. doi:10.1097/chi.0b013e3181354bc2

Van De Wiel, N. H., Matthys, W., Cohen-Kettenis, P., & Van Engeland, H. (2003). Application of the Utrecht Coping Power program and care as usual to children with Disruptive Behavior Disorders in outpatient clinics: A comparative study of cost and course of treatment. *Behavior Therapy, 34*(4), 421-436. doi:10.1016/S0005-7894(03)80028-X

Villodas, M. T., McBurnett, K., Kaiser, N., Rooney, M., & Pfiffner, L. J. (2014). Additive effects of parent adherence on social and behavioral outcomes of a collaborative school–home behavioral intervention for ADHD. *Child Psychiatry & Human Development, 45*(3), 348-360.

Wahler, R.G. (1980). The insular mother. *Journal of Applied Behavioral Anlaysis, 13*(2). doi: http://dx.doi.org/10.1901/jaba.1980.13-207

Wahler, R. G., Cartor, P. G., Fleischman, J., & Lambert, W. (1993). The impact of synthesis teaching and parent training with mothers of conduct-disordered children. *Journal of Abnormal Child Psychology*, *21*(4), 425-440. doi:10.1007/BF01261602

Walle, D. L., Hobbs, S. A., & Caldwell, H. S. (1984). Sequencing of parent training procedures: Effects on child noncompliance and treatment acceptability. *Behavior Modification, 8*, 540-552.

Walle, D. L., Hobbs, S. A., & Caldwell, H. (1984). Sequencing of parent training procedures: Effects on child noncompliance and treatment acceptability. *Behavior Modification*, *8*(4), 540-552. doi:10.1177/01454455840084005

Webster-Stratton, C. (1981). Modification of mothers’ behaviors and attitudes through a videotape modeling group discussion program. *Behavior Therapy, 12*(5), 634. doi: http://dx.doi.org/10.1016/S0005-7894(81)80135-9

Webster-Stratton, C. (1982). The long-term effects of a videotape modeling parent-training program: Comparison of immediate and 1-year follow-up results. *Behavior Therapy*, *13*(5), 702-714. doi:10.1016/S0005-7894(82)80026-9

Webster-Stratton, C. (1990). Enhancing the effectiveness of self-administered videotape parent training for families with conduct-problem children. *Journal of Abnormal Child Psychology, 18*(5), 479-492. doi:10.1007/BF00911103

Webster-Stratton, C. (1994). Advancing videotape parent training: A comparison study. *Journal of Consulting & Clinical Psychology*, *62*(3), 583-593. doi:10.1037/0022-006X.62.3.583

Webster-Stratton, C., & Hammond, M. (1990). Predictors of treatment outcome in parent training for families with conduct problem children. *Behavior Therapy, 21*(3), 319-337. doi:10.1016/S0005-7894(05)80334-X

Webster-Stratton, C., & Hammond, M. (1997). Treating children with early-onset conduct problems: A comparison of child and parent training interventions. *Journal of Consulting & Clinical Psychology*, *65*(1), 93-109. doi:10.1037/0022-006X.65.1.93

Webster-Stratton, C., Hollinsworth, T., & Kolpacoff, M. (1989). The long-term effectiveness and clinical significance of three cost-effective training programs for families with conduct-problem children. *Journal of Consulting & Clinical Psychology*, *57*(4), 550-553. doi:10.1037/0022-006X.57.4.550

Webster-Stratton, C. H., Reid, M. J., & Beauchaine, T. (2011). Combining parent and child training for young children with ADHD. *Journal of Clinical Child & Adolescent Psychology, 40*(2), 191-203. doi:10.1080/15374416.2011.546044

Webster-Stratton, C., Reid, M., & Hammond, M. (2004). Treating children with early-onset conduct problems: Intervention outcomes for parent, child, and teacher training. *Journal of Clinical Child & Adolescent Psychology*, *33*(1), 105-124. doi:10.1207/S15374424JCCP3301_11

Weinberg, H. A. (1999). Parent training for attention-deficit hyperactivity disorder: Parental and child outcome. *Journal of Clinical Psychology*, *55*(7), 907-913. doi:10.1002/(SICI)1097-4679(199907)55:7&lt;907::AID-JCLP11&gt;3.0.CO;2-3

Wells, K. C., & Egan, J. (1988). Social learning and systems family therapy for childhood oppositional disorder: Comparative treatment outcome. *Comprehensive Psychiatry*, *29*(2), 138-146. doi:10.1016/0010-440X(88)90006-5

Wells, K. C., Forehand, R. L., & Griest, D. L. (1980). Generality of treatment effects from treated to untreated behaviors resulting from a parent training program. *Journal of Clinical Child Psychology*, *9*(3), 217-219. doi:10.1080/15374418009532993

Wells, K. C., Griest, D. L., & Forehand, R. (1980). The use of a self-control package to enhance temporal generality of a parent training program. *Behaviour Research & Therapy*, *18*(4), 347-353. doi:10.1016/0005-7967(80)90094-7

Werba, B. E., Eyberg, S. M., Boggs, S. R., & Algina, J. (2006). Predicting outcome in parent-child interaction therapy: Success and attrition. *Behavior Modification*, *30*(5), 618-646. doi:10.1177/0145445504272977

Williams, J. L., Armstrong, K. H., Agazzi, H., & Bradley-Klug, K. L. (2010). Helping Our Toddlers, Developing Our Children's Skills (HOT DOCS): A parenting intervention to prevent and address challenging behavior in young children. *Journal of Early Childhood & Infant Psychology*, 61-20.

Wiggins, T. L., Sofronoff, K., & Sanders, M. R. (2009). Pathways Triple P-positive parenting program: Effects on parent-child relationships and child behavior problems. *Family Process*, *48*(4), 517-530. doi:10.1111/j.1545-5300.2009.01299.x

Wolfe, D. A., Edwards, B., Manion, I., & Koverola, C. (1988). Early intervention for parents at risk of child abuse and neglect: A preliminary investigation. *Journal of Consulting & Clinical Psychology*, *56*(1), 40-47. doi:10.1037/0022-006X.56.1.40

Worland, Carney, Weinberg, & Milich (1982). Dropping out of group behavioral training. *Behavioral Counseling Quarterly, 2*, 37-41.

Zangwill, W. M. (1983). An evaluation of a parent training program. *Child & Family Behavior Therapy, 5*(4), 1-16. doi:10.1300/J019v05n04_01

Zubrick, S. R., Ward, K. A., Silburn, S. R., Lawrence, D., Williams, A. A., Blair, E., & ... Sanders, M. R. (2005). Prevention of child behavior problems through universal implementation of a group behavioral family intervention. *Prevention Science*, *6*(4), 287-304. doi:10.1007/s11121-005-0013-2
